# Supplementary material for: Tandem-type Pd(ii)-catalyzed oxidative Heck reaction/intramolecular C–H amidation sequence: a novel route to 4-aryl-2-quinolinones
Source: Royal Society of Chemistry journal article supplement (doi:10.1039/c2cc30600j), 2012-01-01
Supplement: c2cc30600j_2.pdf [file c2cc30600j_2.pdf]

**Electronic Supplementary Information**  
~ **Experimental Procedures and Spectral/Analytical Data** ~

**Tandem-Type Pd(II)-Catalyzed Oxidative Heck Reaction/  
Intramolecular C–H Amidation Sequence:  
A Novel Route to 4-Aryl-2-Quinolinones**

**Kiyofumi Inamoto,\* Junpei Kawasaki, Kou Hiroya, Yoshinori Kondo and Takayuki Doi\***

*Graduate School of Pharmaceutical Sciences, Tohoku University*

*6-3, Aoba, Aramaki, Aoba-ku, Sendai 980-8578, Japan*

*inamoto@mail.pharm.tohoku.ac.jp, doi\_taka@mail.pharm.tohoku.ac.jp*

|                                                                              |           |
|------------------------------------------------------------------------------|-----------|
| <b>1. General Comments</b>                                                   | <b>2</b>  |
| <b>2. Detailed Results of Optimization of Reaction Conditions (Table S1)</b> | <b>3</b>  |
| <b>3. Effect of Substituent <u>R</u> on Nitrogen Atom (Table S2)</b>         | <b>4</b>  |
| <b>4. Preparation of Cinnamamides</b>                                        | <b>5</b>  |
| <b>5. Analytical Data of 2-Quinolinones</b>                                  | <b>8</b>  |
| <b>6. References</b>                                                         | <b>16</b> |

## General Comments

All reactions were carried out under an Ar atmosphere unless otherwise noted. Acetic acid was purchased from Sigma-Aldrich (>99%) and used as received. All other commercially available materials, including boronic acids and palladium, copper, and silver salts, were used as received. Starting *N*-methoxy-3-arylacrylamides (**1a–h**) were prepared from 3-arylacrylic acids and *O*-methylhydroxylamine via the formation of the corresponding acid chlorides.

Melting points were measured with a Yazawa micro melting point apparatus and uncorrected. <sup>1</sup>H-NMR spectra were recorded on a JEOL JNM-AL400 (400 MHz) spectrometer. Chemical shifts (δ) are given from TMS (0 ppm) in CDCl<sub>3</sub> or from residual non-deuterated solvent peak in DMSO-*d*<sub>6</sub> (2.49 ppm), and coupling constants are expressed in hertz (Hz). The following abbreviations are used: s = singlet, d = doublet, t = triplet, q = quartet, dd = double doublet, td = triple doublet, m = multiplet, br.s = broad singlet, and br = broad signal. <sup>13</sup>C-NMR spectra were recorded on a JEOL JNM-AL400 (100 MHz) spectrometer and chemical shifts (δ) are given from <sup>13</sup>CDCl<sub>3</sub> (77.0 ppm) or DMSO-*d*<sub>6</sub> (39.7 ppm). Mass spectra and high resolution mass spectra were measured on a JEOL JMS-DX303 and JMS-700/JMS-T 100 GC spectrometer, respectively. Elemental analyses were performed by Yanaco CHN CORDER MT-6.

**Table S1** Detailed Results of Optimization of Reaction Conditions<sup>a</sup>

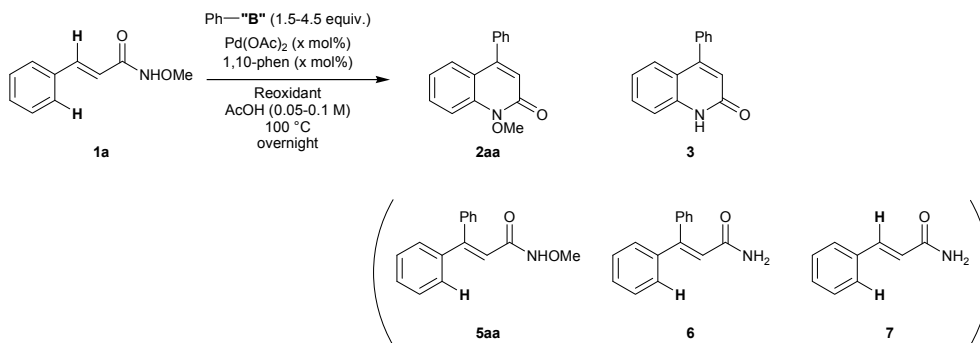

| Entry                 | Ph-"B" (equiv.)                                                                           | x (mol%)  | Reoxidant (equiv.)                                                                 | Yield <sup>b</sup> (%) |           |          |          |          |          |
|-----------------------|-------------------------------------------------------------------------------------------|-----------|------------------------------------------------------------------------------------|------------------------|-----------|----------|----------|----------|----------|
|                       |                                                                                           |           |                                                                                    | 2aa                    | 3         | 5aa      | 6        | 7        | 1a       |
| 1                     | (PhBO) <sub>3</sub> (1.5)                                                                 | 30        | K <sub>2</sub> S <sub>2</sub> O <sub>8</sub> (2)                                   | 0                      | 0         | 0        | 0        | 0        | 0        |
| 2                     | (PhBO) <sub>3</sub> (1.5)                                                                 | 30        | Oxone (2)                                                                          | 0                      | 4         | 0        | 40       | 0        | 0        |
| 3                     | (PhBO) <sub>3</sub> (1.5)                                                                 | 30        | Cu(OAc) <sub>2</sub> (2)                                                           | 0                      | 19        | 0        | 14       | 0        | 0        |
| 4                     | (PhBO) <sub>3</sub> (1.5)                                                                 | 30        | Cu(OAc) <sub>2</sub> · nH <sub>2</sub> O (2)                                       | 0                      | 22        | 0        | 13       | 0        | 0        |
| 5                     | (PhBO) <sub>3</sub> (1.5)                                                                 | 30        | Cu(TFA) <sub>2</sub> · nH <sub>2</sub> O (2)                                       | 0                      | 31        | 0        | 4        | 0        | 0        |
| 6                     | (PhBO) <sub>3</sub> (1.5)                                                                 | 30        | Cu(TFA) <sub>2</sub> · nH <sub>2</sub> O (2) + AgOTs (2)                           | 0                      | 52        | 0        | 0        | 0        | 0        |
| 7                     | (PhBO) <sub>3</sub> (1.5)                                                                 | 30        | Cu(TFA) <sub>2</sub> · nH <sub>2</sub> O (2) + Ag <sub>2</sub> CO <sub>3</sub> (2) | 0                      | 50        | 0        | 0        | 0        | 0        |
| 8                     | (PhBO) <sub>3</sub> (1.5)                                                                 | 30        | Cu(TFA) <sub>2</sub> · nH <sub>2</sub> O (2) + AgOAc (2)                           | 0                      | 53        | 0        | 0        | 0        | 0        |
| 9                     | (PhBO) <sub>3</sub> (1.5)                                                                 | 30        | Cu(TFA) <sub>2</sub> · nH <sub>2</sub> O (2) + AgOTf (2)                           | 0                      | 61        | 0        | 0        | 0        | 0        |
| 10                    | (PhBO) <sub>3</sub> (1.5)                                                                 | 30        | Cu(TFA) <sub>2</sub> · nH <sub>2</sub> O (2) + Ag <sub>2</sub> O (2)               | 0                      | 68        | 0        | 3        | 0        | 0        |
| 11                    | (PhBO) <sub>3</sub> (1.5)                                                                 | 10        | Cu(TFA) <sub>2</sub> · nH <sub>2</sub> O (2) + Ag <sub>2</sub> O (2)               | 0                      | 49        | 0        | 5        | 0        | 0        |
| 12                    | 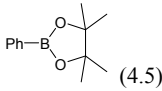 (4.5) | 10        | Cu(TFA) <sub>2</sub> · nH <sub>2</sub> O (2) + Ag <sub>2</sub> O (2)               | 0                      | 48        | 0        | 3        | 0        | 0        |
| 13                    | PhBF <sub>3</sub> K (4.5)                                                                 | 10        | Cu(TFA) <sub>2</sub> · nH <sub>2</sub> O (2) + Ag <sub>2</sub> O (1)               | 0                      | 55        | 0        | 2        | 0        | 0        |
| <b>14</b>             | <b>PhB(OH)<sub>2</sub> (4.5)</b>                                                          | <b>10</b> | <b>Cu(TFA)<sub>2</sub> · nH<sub>2</sub>O (2) + Ag<sub>2</sub>O (1)</b>             | <b>0</b>               | <b>60</b> | <b>0</b> | <b>2</b> | <b>0</b> | <b>0</b> |
| 15                    | PhB(OH) <sub>2</sub> (4.5)                                                                | 10        | Cu(TFA) <sub>2</sub> · nH <sub>2</sub> O (2) + Ag <sub>2</sub> O (4)               | 66                     | 0         | 0        | 0        | 0        | 0        |
| 16                    | PhB(OH) <sub>2</sub> (4.5)                                                                | 10        | Cu(TFA) <sub>2</sub> · nH <sub>2</sub> O (1) + Ag <sub>2</sub> O (4)               | 64                     | 0         | 24       | 0        | 0        | 12       |
| <b>17</b>             | <b>PhB(OH)<sub>2</sub> (4.5)</b>                                                          | <b>10</b> | <b>Cu(TFA)<sub>2</sub> · nH<sub>2</sub>O (1) + Ag<sub>2</sub>O (8)</b>             | <b>76</b>              | <b>0</b>  | <b>0</b> | <b>0</b> | <b>0</b> | <b>0</b> |
| 18                    | PhB(OH) <sub>2</sub> (4.5)                                                                | 10        | Cu(TFA) <sub>2</sub> · nH <sub>2</sub> O (1) + Ag <sub>2</sub> O (10)              | 65                     | 0         | 0        | 0        | 0        | 0        |
| <b>19<sup>c</sup></b> | <b>PhB(OH)<sub>2</sub> (4.5)</b>                                                          | <b>10</b> | <b>Cu(TFA)<sub>2</sub> · nH<sub>2</sub>O (1) + Ag<sub>2</sub>O (8)</b>             | <b>81</b>              | <b>0</b>  | <b>0</b> | <b>0</b> | <b>0</b> | <b>0</b> |
| 20 <sup>d</sup>       | PhB(OH) <sub>2</sub> (4.5)                                                                | 10        | Cu(TFA) <sub>2</sub> · nH <sub>2</sub> O (1) + Ag <sub>2</sub> O (8)               | 54                     | 0         | 0        | 0        | 0        | 28       |
| 21                    | PhB(OH) <sub>2</sub> (4.5)                                                                | 10        | Ag <sub>2</sub> O (8)                                                              | 44                     | 0         | 44       | 0        | 0        | 0        |
| 22                    | PhB(OH) <sub>2</sub> (4.5)                                                                | 10        | none                                                                               | 0                      | 0         | 16       | 7        | 14       | 16       |
| 23                    | PhB(OH) <sub>2</sub> (4.5)                                                                | 0         | Cu(TFA) <sub>2</sub> · nH <sub>2</sub> O (1)                                       | 0                      | 0         | 0        | 0        | 22       | 53       |
| 24                    | PhB(OH) <sub>2</sub> (4.5)                                                                | 0         | Ag <sub>2</sub> O (8)                                                              | 0                      | 0         | 0        | 0        | 0        | 95       |

<sup>a</sup> Reactions were carried out on a 0.11 mmol scale.

<sup>b</sup> Isolated yield.

<sup>c</sup> The reaction mixture was first stirred at 100 °C for 1 h and then stirred at 120 °C for 10 h.

<sup>d</sup> Under an O<sub>2</sub> atmosphere.

**Table S2** Effect of Substituent R on Nitrogen Atom<sup>a</sup>

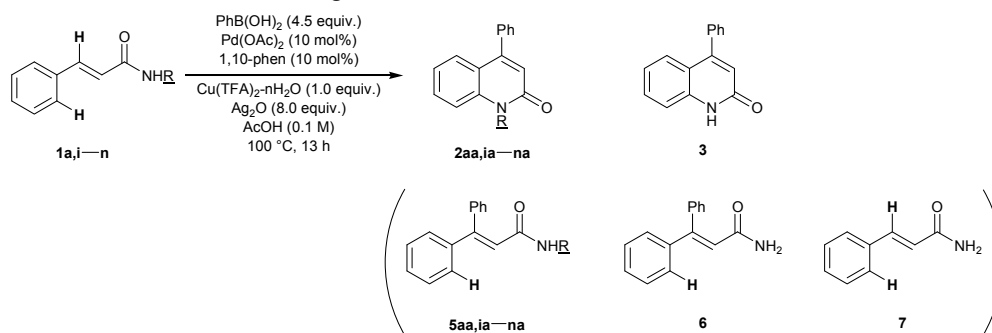

| Entry          | <u>R</u>           | Yield <sup>b</sup> (%) |          |                   |                 |          |          |
|----------------|--------------------|------------------------|----------|-------------------|-----------------|----------|----------|
|                |                    | <b>2</b>               | <b>3</b> | <b>5</b>          | <b>6</b>        | <b>7</b> | <b>1</b> |
| 1              | OMe ( <b>1a</b> )  | 76 ( <b>2aa</b> )      | 0        | 0 ( <b>5aa</b> )  | 0               | 0        | 0        |
| 2              | OBn ( <b>1i</b> )  | 56 ( <b>2ia</b> )      | 0        | 17 ( <b>5ia</b> ) | 0               | 0        | 0        |
| 3              | OH ( <b>1j</b> )   | 0 ( <b>2ja</b> )       | 0        | 0 ( <b>5ja</b> )  | 0               | 0        | 58       |
| 4              | OPh ( <b>1k</b> )  | <17 ( <b>2ka</b> )     | 0        | 9 ( <b>5ka</b> )  | 0               | 0        | 0        |
| 5              | OPiv ( <b>1l</b> ) | 0 ( <b>2la</b> )       | 0        | 0 ( <b>5la</b> )  | 20              | 23       | 0        |
| 6 <sup>c</sup> | H ( <b>1m</b> )    | 0 ( <b>2ma</b> )       | 0        | 86 ( <b>5ma</b> ) | (= <b>5ma</b> ) | 0        | 0        |
| 7              | Ts ( <b>1n</b> )   | 0 ( <b>2na</b> )       | 0        | 81 ( <b>5na</b> ) | 0               | 0        | 0        |

<sup>a</sup> Reactions were carried out on a 0.11 mmol scale.

<sup>b</sup> Isolated yield.

<sup>c</sup> Reaction was carried out in the presence of 2 equiv. of Cu(TFA)<sub>2</sub>·nH<sub>2</sub>O and 1 equiv. of Ag<sub>2</sub>O.

## Representative Procedure for Preparation of Cinnamamides (1a–h)

### *N*-Methoxy-3-phenylacrylamide (1a)

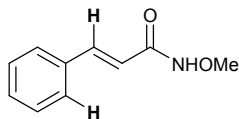

To a solution of cinnamic acid (2.0 g, 13.5 mmol) in  $\text{CH}_2\text{Cl}_2$  (20 mL) were added oxalyl chloride (1.7 mL, 20.3 mmol) and a few drops of DMF at room temperature. After being stirred for 1 h at room temperature, *O*-methylhydroxylamine hydrochloride (1.7 g, 20.3 mmol) was added. The reaction mixture was cooled to 0 °C and stirred for 20 minutes, and then pyridine (5.4 mL, 40.5 mmol) was added dropwise and stirred for 1 h at room temperature. The resulting mixture was treated with 1N HCl (20 mL) and the aqueous phase was extracted with AcOEt (20 mL  $\times$  3). The combined organic layer was washed with brine (20 mL) and dried over  $\text{MgSO}_4$ . The solvent was evaporated and the residue was purified by silica gel column chromatography [hexane-AcOEt (2 : 1)] to give **1a** (1.9 g, 81%) as a white solid. Recrystallization from hexane/ $\text{CHCl}_3$  gave **1a** as white prisms; mp 91–92 °C (lit.<sup>1</sup> 93–95 °C); IR  $\nu$  (film,  $\text{cm}^{-1}$ ) 3171, 1659, 1627, 1065;  $^1\text{H-NMR}$  (400 MHz,  $\text{CDCl}_3$ )  $\delta$  3.84 (3H, s), 6.60 (1H, br.s), 7.32 (3H, br.s), 7.50 (2H, br.s), 7.75 (1H, d,  $J = 16.4$  Hz), 10.44 (1H, br.s);  $^{13}\text{C-NMR}$  (100 MHz,  $\text{CDCl}_3$ )  $\delta$  64.4, 117.0, 127.9, 128.8, 129.9, 134.6, 141.8, 164.8; MS  $m/z$  (relative intensity) 177 ( $\text{M}^+$ , 62), 131 (100); HRMS calcd for  $\text{C}_{10}\text{H}_{11}\text{NO}_2$  177.0790, found 177.0781.

### *N*-Methoxy-3-(4-methylphenyl)acrylamide (1b)

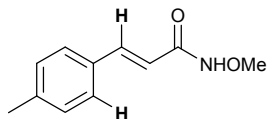

Yield: 86%

Recrystallization from hexane/AcOEt gave **1b** as white prisms; mp 111–112 °C; IR  $\nu$  (film,  $\text{cm}^{-1}$ ) 3172, 1660, 1626, 1065;  $^1\text{H-NMR}$  (400 MHz,  $\text{DMSO-}d_6$ )  $\delta$  2.31 (3H, s), 3.65 (3H, s), 6.35 (1H, d,  $J = 15.6$  Hz), 7.21 (2H, d,  $J = 8.0$  Hz), 7.46 (2H, d,  $J = 8.0$  Hz), 7.46 (1H, d,  $J = 15.6$  Hz), 11.23 (1H, br.s);  $^{13}\text{C-NMR}$  (100 MHz,  $\text{DMSO-}d_6$ )  $\delta$  21.0, 63.4, 117.4, 127.6, 129.5 (2 signals), 131.8, 139.6, 162.9; MS  $m/z$  (relative intensity) 191 ( $\text{M}^+$ , 81), 145 (100); HRMS calcd for  $\text{C}_{11}\text{H}_{13}\text{NO}_2$  191.0946, found 191.0945.

### *N*-Methoxy-3-(4-fluorophenyl)acrylamide (1c)

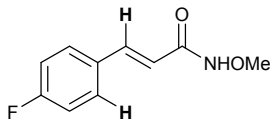

Yield: 35%

Recrystallization from hexane/AcOEt gave **1c** as white prisms; mp 113–114 °C; IR  $\nu$  (film,  $\text{cm}^{-1}$ ) 3175, 1661, 1628, 1601, 1510, 1065;  $^1\text{H-NMR}$  (400 MHz,  $\text{DMSO-}d_6$ )  $\delta$  3.65 (3H, s), 6.36 (1H, d,  $J = 16.0$  Hz), 7.23 (2H, t,  $J = 9.0$  Hz), 7.48 (1H, d,  $J = 16.0$  Hz), 7.64 (2H, br.s), 11.26 (1H, br.s);  $^{13}\text{C-NMR}$  (100 MHz,  $\text{DMSO-}d_6$ )  $\delta$  63.3, 115.8 ( $J = 21.4$ ), 118.4, 129.8 ( $J = 6.6$  Hz), 131.2 ( $J = 3.3$  Hz), 138.3, 162.5, 162.3 ( $J = 248.5$  Hz); MS  $m/z$  (relative intensity) 195 ( $\text{M}^+$ , 81), 149 (100); HRMS calcd for  $\text{C}_{10}\text{H}_{10}\text{FNO}_2$  195.0696, found 195.0698.

#### *N*-Methoxy-3-(4-chlorophenyl)acrylamide (**1d**)

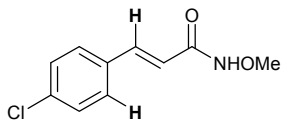

Yield: 72%

Recrystallization from hexane/AcOEt gave **1d**; mp 145–146 °C; IR  $\nu$  (film,  $\text{cm}^{-1}$ ) 3182, 1658, 1625, 1492, 1063;  $^1\text{H-NMR}$  (400 MHz,  $\text{DMSO-}d_6$ )  $\delta$  3.67 (3H, s), 6.41 (1H, d,  $J = 16.4$  Hz), 7.45 (2H, d,  $J = 8.4$  Hz), 7.47 (1H, d,  $J = 16.4$  Hz), 7.59 (2H, d,  $J = 8.4$  Hz), 11.29 (1H, br.s);  $^{13}\text{C-NMR}$  (100 MHz,  $\text{DMSO-}d_6$ )  $\delta$  63.3, 119.4, 128.9, 129.3, 133.6, 134.1, 138.2, 162.4; MS  $m/z$  (relative intensity) 211 ( $\text{M}^+$ , 77), 165 (100); HRMS calcd for  $\text{C}_{10}\text{H}_{10}^{35}\text{ClNO}_2$  211.0400, found 211.0394.

#### *N*-Methoxy-3-(4-methoxyphenyl)acrylamide (**1e**)

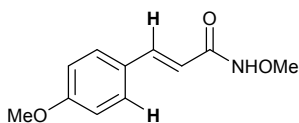

Yield: 68%

Recrystallization from hexane/AcOEt gave **1e** as pale white prisms; mp 130–132 °C (lit.<sup>2</sup> 132–135 °C); IR  $\nu$  (film,  $\text{cm}^{-1}$ ) 3166, 1652, 1608, 1515, 1174;  $^1\text{H-NMR}$  (400 MHz,  $\text{DMSO-}d_6$ )  $\delta$  3.64 (3H, s), 3.77 (3H, s), 6.26 (1H, d,  $J = 15.6$  Hz), 6.96 (2H, d,  $J = 8.0$  Hz), 7.44 (1H, d,  $J = 15.6$  Hz), 7.52 (2H, d,  $J = 8.0$  Hz), 11.20 (1H, br.s);  $^{13}\text{C-NMR}$  (100MHz,  $\text{DMSO-}d_6$ )  $\delta$  55.3, 63.4, 114.4, 115.9, 127.2, 129.3, 139.3, 160.5, 163.1; MS  $m/z$  (relative intensity) 207 ( $\text{M}^+$ , 66), 161 (100); HRMS calcd for  $\text{C}_{11}\text{H}_{13}\text{NO}_3$  207.0895, found 207.0879.

#### *N*-Methoxy-3-(3-methylphenyl)acrylamide (**1f**)

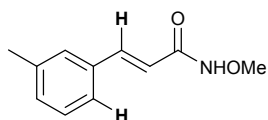

Yield: 86%

Recrystallization from hexane/AcOEt gave **1f** as white needles; mp 85–86 °C; IR  $\nu$  (film,  $\text{cm}^{-1}$ ) 3171, 1659, 1627, 1066;  $^1\text{H-NMR}$  (400 MHz,  $\text{DMSO-}d_6$ )  $\delta$  2.31 (3H, s), 3.66 (3H, s), 6.39 (1H, d,  $J = 16.0$  Hz), 7.19 (1H, d,  $J = 7.6$  Hz), 7.28 (1H, t,  $J = 7.6$  Hz), 7.36 (2H, m), 7.45 (1H, d,  $J = 16.0$  Hz), 11.27 (1H, br.s);  $^{13}\text{C-NMR}$  (100 MHz,  $\text{DMSO-}d_6$ )  $\delta$  20.9, 63.4, 118.3, 124.8, 128.1, 128.8, 130.4, 134.5, 138.1, 139.7, 162.7; MS  $m/z$  (relative intensity) 191 ( $\text{M}^+$ , 61), 145 (100); HRMS calcd for  $\text{C}_{11}\text{H}_{13}\text{NO}_2$  191.0946, found 191.0930; *Anal.* Calcd for  $\text{C}_{11}\text{H}_{13}\text{NO}_2$ : C, 69.09; H, 6.85; N, 7.32. Found: C, 69.09; H, 7.01; N, 7.34.

#### *N*-Methoxy-3-(2-methylphenyl)acrylamide (**1g**)

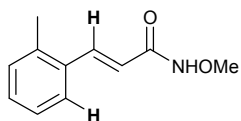

Yield: 93%

Recrystallization from hexane/AcOEt gave **1g** as white prisms; mp 96–97 °C; IR  $\nu$  (film,  $\text{cm}^{-1}$ ) 3165, 1658, 1624, 1601,

1066;  $^1\text{H-NMR}$  (400 MHz,  $\text{DMSO-}d_6$ )  $\delta$  2.34 (3H, s), 3.67 (3H, s), 6.32 (1H, d,  $J = 16.0$  Hz), 7.20–7.28 (3H, m), 7.52 (1H, d,  $J = 6.4$  Hz), 7.72 (1H, d,  $J = 16.0$  Hz), 11.31 (1H, br.s);  $^{13}\text{C-NMR}$  (100 MHz,  $\text{DMSO-}d_6$ )  $\delta$  19.3, 63.4, 119.7, 125.9, 126.4, 129.4, 130.7, 133.4, 136.8, 137.0, 162.7; MS  $m/z$  (relative intensity) 191 ( $\text{M}^+$ , 44), 145 (100); HRMS calcd for  $\text{C}_{11}\text{H}_{13}\text{NO}_2$  191.0946, found 191.0946.

***N*-Methoxy-3-(3-methoxyphenyl)acrylamide (1h)**

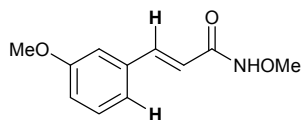

Yield: 75%.

Recrystallization from hexane/ $\text{CHCl}_3$  gave **1h** as white prisms; mp 109–110 °C; IR  $\nu$  (film,  $\text{cm}^{-1}$ ) 3165, 1660, 1627, 1581, 1261, 1157;  $^1\text{H-NMR}$  (400 MHz,  $\text{DMSO-}d_6$ )  $\delta$  3.65 (3H, s), 3.77 (3H, s), 6.42 (1H, d,  $J = 16.0$  Hz), 6.95 (1H, d,  $J = 8.0$  Hz), 7.13 (1H, s), 7.14 (1H, d,  $J = 8.0$  Hz), 7.31 (1H, t,  $J = 8.0$  Hz), 7.47 (1H, d,  $J = 16.0$  Hz), 11.29 (1H, br.s);  $^{13}\text{C-NMR}$  (100 MHz,  $\text{DMSO-}d_6$ )  $\delta$  55.1, 63.4, 112.7, 115.5, 118.9, 120.0, 130.0, 136.0, 139.5, 159.6, 162.7; MS  $m/z$  (relative intensity) 207 ( $\text{M}^+$ , 56), 161 (100); HRMS calcd for  $\text{C}_{11}\text{H}_{13}\text{NO}_3$  207.0895, found 207.0890.

## Representative Procedure for 2-Quinolinone Synthesis

### 1-Methoxy-4-phenyl-1*H*-quinolin-2-one (2aa) (Table 1, Entry15)

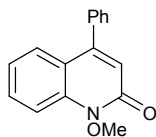

A mixture of **1a** (19.8 mg, 0.11 mmol), PhB(OH)<sub>2</sub> (**4a**, 61.5 mg, 0.50 mmol), Pd(OAc)<sub>2</sub> (2.5 mg, 0.011 mmol), 1,10-phenanthroline (2.0 mg, 0.011 mmol), Cu(TFA)<sub>2</sub>·nH<sub>2</sub>O (32.4 mg, 0.11 mmol), and Ag<sub>2</sub>O (208 mg, 0.090 mmol) in AcOH (2.2 mL, 0.05 M) was stirred at 100 °C overnight. The reaction mixture was extracted with AcOEt (5 mL× 3) and the combined organic layer was washed with brine (10 mL), and dried over MgSO<sub>4</sub>. The solvent was evaporated and the residue was purified by flash silica gel column chromatography [hexane-AcOEt (4 : 1)] to give **2aa** (21.3 mg, 76%) as a colorless solid.

Mp 97–98 °C (colorless scales from CHCl<sub>3</sub>/hexane); IR  $\nu$  (film, cm<sup>-1</sup>) 2924, 1666; <sup>1</sup>H-NMR (400 MHz, CDCl<sub>3</sub>)  $\delta$  4.16 (3H, s), 6.70 (1H, s), 7.20 (1H, t, *J* = 7.9 Hz), 7.40–7.42 (2H, m), 7.46–7.53 (3H, m), 7.56 (1H, dd, *J* = 7.9, 1.2 Hz), 7.63 (1H, td, *J* = 7.5, 1.2 Hz), 7.71 (1H, dd, *J* = 7.9, 1.2 Hz); <sup>13</sup>C-NMR (100 MHz, CDCl<sub>3</sub>)  $\delta$  62.9, 112.0, 119.6, 121.9, 122.6, 127.5, 128.5, 128.7, 128.8, 131.1, 136.5, 137.9, 150.6, 157.2; MS *m/z* (relative intensity) 251 (M<sup>+</sup>, 32), 221 (100); HRMS calcd for C<sub>16</sub>H<sub>13</sub>NO<sub>2</sub> 251.0946, found 251.0917.

### 1-Methoxy-7-methyl-4-(4-methylphenyl)-1*H*-quinolin-2-one (2bb)

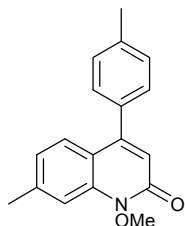

Mp 101–102 °C (colorless scales from AcOEt/hexane); IR  $\nu$  (film, cm<sup>-1</sup>) 2985, 1668, 1615; <sup>1</sup>H-NMR (400 MHz, CDCl<sub>3</sub>)  $\delta$  2.45 (3H, s), 2.52 (3H, s), 4.15 (3H, s), 6.62 (1H, s), 7.02 (1H, d, *J* = 8.6 Hz), 7.30 (4H, br), 7.47 (1H, d, *J* = 8.6 Hz), 7.50 (1H, s); <sup>13</sup>C-NMR (100 MHz, CDCl<sub>3</sub>)  $\delta$  21.3, 22.0, 62.8, 112.0, 117.7, 120.6, 124.0, 127.5, 128.7, 129.3, 133.9, 138.1, 138.8, 142.0, 150.7, 157.6; MS *m/z* (relative intensity) 279 (M<sup>+</sup>, 87), 249 (100); HRMS calcd for C<sub>18</sub>H<sub>17</sub>NO<sub>2</sub> 279.1259, found 279.1252.

### 7-Fluoro-4-(4-fluorophenyl)-1-methoxy-1*H*-quinolin-2-one (2cc)

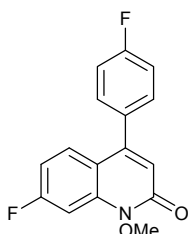

Mp 173–174 °C (colorless scales from CHCl<sub>3</sub>/hexane); IR  $\nu$  (film, cm<sup>-1</sup>) 2925, 1673, 1622; <sup>1</sup>H-NMR (400 MHz, CDCl<sub>3</sub>)  $\delta$  4.15 (3H, s), 6.61 (1H, s), 6.94 (1H, td, *J* = 8.6, 2.7 Hz), 7.20 (2H, t, *J* = 8.6 Hz), 7.36–7.40 (3H, m), 7.50 (1H, dd, *J* = 8.6, 5.4 Hz); <sup>13</sup>C-NMR (100 MHz, CDCl<sub>3</sub>)  $\delta$  63.0, 99.1 (*J* = 14.0 Hz), 111.0 (*J* = 11.6 Hz), 115.9 (*J* = 10.7 Hz), 116.2 (121.0 (*J* = 1.3 Hz), 129.8 (*J* = 5.0 Hz), 130.5 (*J* = 4.2 Hz), 132.4 (*J* = 2.1 Hz), 139.7 (*J* = 5.8 Hz), 149.3, 157.3, 163.1 (*J*



= 123.9 Hz), 164.7 ( $J = 125.2$ ); MS  $m/z$  (relative intensity) 287 ( $M^+$ , 55), 257 (100); HRMS calcd for  $C_{16}H_{11}F_2NO_2$  287.0758, found 287.0744.

#### 7-Chloro-4-(4-chlorophenyl)-1-methoxy-1H-quinolin-2-one (2dd)

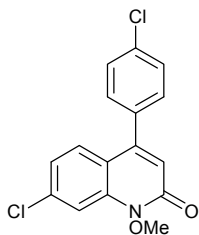

Mp 209–210 °C (colorless scales from  $CHCl_3$ /hexane); IR  $\nu$  (film,  $cm^{-1}$ ) 2917, 1674;  $^1H$ -NMR (400 MHz,  $CDCl_3$ )  $\delta$  4.16 (3H, s), 6.66 (1H, s), 7.17 (1H, dd,  $J = 8.8, 2.0$  Hz), 7.34 (2H, d,  $J = 8.0$  Hz), 7.42 (1H, d,  $J = 8.8$  Hz), 7.50 (2H, d,  $J = 8.0$  Hz), 7.70 (1H, d,  $J = 2.0$  Hz);  $^{13}C$ -NMR (100 MHz,  $CDCl_3$ )  $\delta$  63.1, 112.1, 117.9, 122.1, 123.3, 128.6, 129.1, 130.0, 134.6, 135.4, 137.9, 138.9, 149.0, 157.0; MS  $m/z$  (relative intensity) 319 ( $M^+$ , 62), 289 (100); HRMS calcd for  $C_{16}H_{11}^{35}Cl_2NO_2$  319.0167, found 319.0173.

#### 1,7-Dimethoxy-4-(4-methoxyphenyl)-1H-quinolin-2-one (2ee)

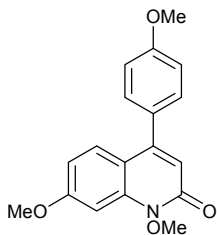

IR  $\nu$  (film,  $cm^{-1}$ ) 2923, 1664, 1610, 1248;  $^1H$ -NMR (400 MHz,  $CDCl_3$ )  $\delta$  3.89 (3H, s), 3.95 (3H, s), 4.15 (3H, s), 6.52 (1H, s), 6.79 (1H, dd,  $J = 8.8, 2.4$  Hz), 7.02 (2H, d,  $J = 8.8$  Hz), 7.14 (1H, d,  $J = 2.4$  Hz), 7.35 (2H, d,  $J = 8.8$  Hz), 7.52 (1H, d,  $J = 8.8$  Hz);  $^{13}C$ -NMR (100 MHz,  $CDCl_3$ )  $\delta$  55.4, 55.7, 62.7, 95.3, 111.1, 113.8, 114.0, 118.5, 129.20, 129.25, 130.1, 139.8, 150.3, 157.9, 160.1, 162.3; MS  $m/z$  (relative intensity) 311 ( $M^+$ , 100), 281 ( $M^+$ , 83); HRMS calcd for  $C_{18}H_{17}NO_4$  311.1158, found 311.1158.

#### 1-Methoxy-6-methyl-4-(3-methylphenyl)-1H-quinolin-2-one (2ff)

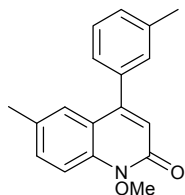

Colorless oil; IR  $\nu$  (film,  $cm^{-1}$ ) 2925, 1665;  $^1H$ -NMR (400 MHz,  $CDCl_3$ )  $\delta$  2.35 (3H, s), 2.44 (3H, s), 4.14 (3H, s), 6.66 (1H, s), 7.21 (1H, d,  $J = 7.6$  Hz), 7.22 (1H, d,  $J = 1.2$  Hz), 7.30 (1H, d,  $J = 7.6$  Hz), 7.33 (1H, s), 7.40 (1H, t,  $J = 7.6$  Hz), 7.45 (1H, dd,  $J = 8.8, 1.2$  Hz), 7.60 (1H, d,  $J = 8.8$  Hz);  $^{13}C$ -NMR (100 MHz,  $CDCl_3$ )  $\delta$  20.9, 21.5, 62.8, 112.0, 119.8, 121.9, 125.9, 127.3, 128.4, 129.4, 129.5, 132.3, 132.4, 136.1, 136.8, 138.4, 150.6, 157.2; MS  $m/z$  (relative intensity) 279 ( $M^+$ , 100); HRMS calcd for  $C_{18}H_{17}NO_2$  279.1259, found 279.1254.

### 1-Methoxy-4-(4-trifluorophenyl)-1H-quinolin-2-one (2ah)

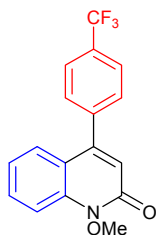

Mp 164–165 °C (colorless needles from CHCl<sub>3</sub>/hexane); IR  $\nu$  (film, cm<sup>-1</sup>) 2917, 1668, 1593, 1325, 1107; <sup>1</sup>H-NMR (400 MHz, CDCl<sub>3</sub>)  $\delta$  4.17 (3H, s), 6.71 (1H, s), 7.23 (1H, t,  $J$  = 8.0 Hz), 7.45 (1H, d,  $J$  = 8.0 Hz), 7.55 (2H, d,  $J$  = 8.4 Hz), 7.66 (1H, t,  $J$  = 8.0 Hz), 7.74 (1H, d,  $J$  = 8.0 Hz), 7.79 (2H, d,  $J$  = 8.4 Hz); <sup>13</sup>C-NMR (100 MHz, CDCl<sub>3</sub>)  $\delta$  62.9, 112.3, 119.2, 122.5, 122.9, 124.0 ( $J$  = 275.2 Hz), 125.7 ( $J$  = 3.6 Hz), 127.2, 129.3, 131.1 ( $J$  = 33.5 Hz), 131.6, 138.2, 140.2, 149.2, 157.0; MS  $m/z$  (relative intensity) 319 (M<sup>+</sup>, 59), 289 (100); HRMS calcd for C<sub>17</sub>H<sub>12</sub>F<sub>3</sub>NO<sub>2</sub> 319.0820, found 319.0808.

### 1-Methoxy-4-(3-trifluorophenyl)-1H-quinolin-2-one (2ai)

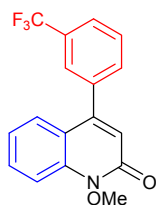

Mp 148–149 °C (colorless scales from CHCl<sub>3</sub>/hexane); IR  $\nu$  (film, cm<sup>-1</sup>) 2938, 1668, 1595, 1328, 1125; <sup>1</sup>H-NMR (400 MHz, CDCl<sub>3</sub>)  $\delta$  4.17 (3H, s), 6.71 (1H, s), 7.24 (1H, t,  $J$  = 8.0 Hz), 7.44 (1H, dd,  $J$  = 8.0, 1.0 Hz), 7.61–7.78 (6H, m); <sup>13</sup>C-NMR (100 MHz, CDCl<sub>3</sub>)  $\delta$  62.9, 112.3, 119.2, 123.0, 123.7 ( $J$  = 259.0 Hz), 125.6 ( $J$  = 3.8 Hz), 125.7 ( $J$  = 3.6 Hz), 127.1, 129.3, 131.2 ( $J$  = 32.7 Hz), 131.5, 132.1, 137.4, 138.1, 149.1, 157.0; MS  $m/z$  (relative intensity) 319 (M<sup>+</sup>, 57), 289 (100); HRMS calcd for C<sub>17</sub>H<sub>12</sub>F<sub>3</sub>NO<sub>2</sub> 319.0820, found 319.0802.

### 1-Methoxy-4-(4-methoxycarbonylphenyl)-1H-quinolin-2-one (2aj)

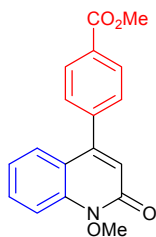

Mp 177–178 °C (colorless scales from CHCl<sub>3</sub>/hexane); IR  $\nu$  (film, cm<sup>-1</sup>) 2949, 1723, 1666, 1606, 1278; <sup>1</sup>H-NMR (400 MHz, CDCl<sub>3</sub>)  $\delta$  3.98 (3H, s), 4.16 (3H, s), 6.71 (1H, s), 7.22 (1H, t,  $J$  = 8.3 Hz), 7.48 (1H, d,  $J$  = 8.3 Hz), 7.51 (2H, d,  $J$  = 8.4 Hz), 7.65 (1H, t,  $J$  = 8.3 Hz), 7.72 (1H, d,  $J$  = 8.3 Hz), 8.18 (2H, d,  $J$  = 8.8 Hz); <sup>13</sup>C-NMR (100 MHz, CDCl<sub>3</sub>)  $\delta$  52.3, 62.9, 112.2, 119.2, 122.2, 122.9, 127.3, 128.9, 129.9, 130.1, 131.4, 138.1, 141.1, 149.6, 157.0, 166.5; MS  $m/z$  (relative intensity) 309 (M<sup>+</sup>, 57), 279 (100); HRMS calcd for C<sub>18</sub>H<sub>15</sub>NO<sub>4</sub> 309.1001, found 309.1007.

### 1,7-Dimethoxy-4-phenyl-1*H*-quinolin-2-one (2ea)

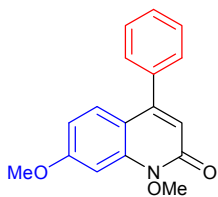

Colorless oil; IR  $\nu$  (film,  $\text{cm}^{-1}$ ) 2935, 1664, 1613, 1382, 1222;  $^1\text{H-NMR}$  (400 MHz,  $\text{CDCl}_3$ )  $\delta$  3.95 (3H, s), 4.16 (3H, s), 6.54 (1H, s), 6.78 (1H, dd,  $J = 8.8, 2.4$  Hz), 7.15 (1H, d,  $J = 2.4$  Hz), 7.39–7.52 (6H, m);  $^{13}\text{C-NMR}$  (100 MHz,  $\text{CDCl}_3$ )  $\delta$  55.7, 62.7, 95.3, 111.2, 113.6, 118.7, 128.6, 128.8 (2 signals), 129.2, 137.0, 139.8, 150.6, 157.8, 162.4; MS  $m/z$  (relative intensity) 281 ( $\text{M}^+$ , 100); HRMS calcd for  $\text{C}_{17}\text{H}_{15}\text{NO}_3$  281.1052, found 281.1046.

### 1-Methoxy-4-(4-methoxyphenyl)-1*H*-quinolin-2-one (2ea')

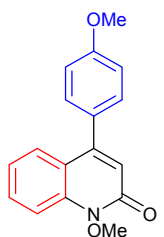

Mp 139–140 °C (colorless scales from  $\text{CHCl}_3$ /hexane); IR  $\nu$  (film,  $\text{cm}^{-1}$ ) 3383, 1667, 1609, 1250;  $^1\text{H-NMR}$  (400 MHz,  $\text{CDCl}_3$ )  $\delta$  3.89 (3H, s), 4.15 (3H, s), 6.68 (1H, s), 4.03 (2H, d,  $J = 8.8$  Hz), 7.21 (1H, t,  $J = 7.9$  Hz), 7.36 (2H, d,  $J = 8.8$  Hz), 7.63 (2H, m), 7.70 (1H, d,  $J = 7.9$  Hz);  $^{13}\text{C-NMR}$  (100 MHz,  $\text{CDCl}_3$ )  $\delta$  55.4, 62.9, 112.1, 114.1, 119.9, 121.7, 122.6, 127.7, 128.9, 130.2, 131.1, 138.1, 150.4, 157.4, 160.2; MS  $m/z$  (relative intensity) 281 ( $\text{M}^+$ , 61), 251 (100); HRMS calcd for  $\text{C}_{17}\text{H}_{15}\text{NO}_3$  281.1052, found 281.1053.

### 1,7-Dimethoxy-4-(4-trifluorophenyl)-1*H*-quinolin-2-one (2ei)

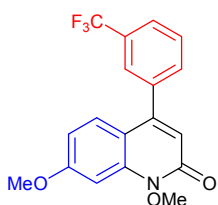

Mp 174–175 °C (colorless scales from  $\text{CHCl}_3$ /hexane); IR  $\nu$  (film,  $\text{cm}^{-1}$ ) 2945, 1666, 1613, 1326, 1105;  $^1\text{H-NMR}$  (400 MHz,  $\text{CDCl}_3$ )  $\delta$  3.96 (3H, s), 4.17 (3H, s), 6.54 (1H, s), 6.80 (1H, dd,  $J = 9.2, 2.4$  Hz), 7.16 (1H, d,  $J = 2.4$  Hz), 7.34 (1H, d,  $J = 9.2$  Hz), 7.53 (2H, d,  $J = 8.8$  Hz), 7.77 (2H, d,  $J = 8.8$  Hz);  $^{13}\text{C-NMR}$  (100 MHz,  $\text{CDCl}_3$ )  $\delta$  55.8, 62.8, 95.5, 111.5, 113.2, 119.2, 123.8 ( $J = 270.5$  Hz), 125.55 ( $J = 3.8$  Hz), 125.63 ( $J = 3.8$  Hz), 128.6, 129.3, 131.2 ( $J = 32.4$  Hz), 132.1, 137.7, 139.9, 149.0, 157.5, 162.7; MS  $m/z$  (relative intensity) 349 ( $\text{M}^+$ , 82), 319 (100); HRMS calcd for  $\text{C}_{18}\text{H}_{14}\text{F}_3\text{NO}_3$  349.0926, found 349.0917.

### 1,7-Dimethoxy-4-(4-methoxycarbonylphenyl)-1*H*-quinolin-2-one (2ej)

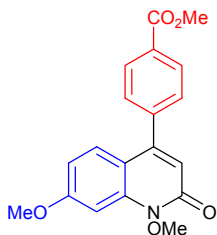

Mp 196–197 °C (colorless scales from CHCl<sub>3</sub>/hexane); IR  $\nu$  (film, cm<sup>-1</sup>) 2921, 1722, 1664, 1611, 1279; <sup>1</sup>H-NMR (400 MHz, CDCl<sub>3</sub>)  $\delta$  3.95 (3H, s), 3.97 (3H, s), 4.16 (3H, s), 6.54 (1H, s), 6.79 (1H, dd,  $J$  = 8.8, 2.4 Hz), 7.15 (1H, d,  $J$  = 2.4 Hz), 7.37 (1H, d,  $J$  = 8.8 Hz), 7.48 (2H, d,  $J$  = 8.4 Hz), 8.16 (2H, d,  $J$  = 8.4 Hz); <sup>13</sup>C-NMR (100 MHz, CDCl<sub>3</sub>)  $\delta$  52.3, 55.7, 62.7, 95.4, 111.4, 113.1, 118.9, 128.8, 128.9, 129.9, 130.6, 139.9, 141.5, 149.5, 157.6, 162.6, 166.5; MS  $m/z$  (relative intensity) 339 (M<sup>+</sup>, 83), 309 (100); HRMS calcd for C<sub>19</sub>H<sub>17</sub>NO<sub>5</sub> 339.1107, found 339.1109.

### 4-(4-Fluorophenyl)-1,7-dimethoxy-1*H*-quinolin-2-one (2ec)

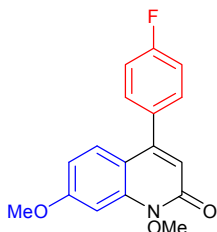

Mp 175–176 °C (colorless scales from CHCl<sub>3</sub>/hexane); IR  $\nu$  (film, cm<sup>-1</sup>) 2917, 1667, 1613, 1326; <sup>1</sup>H-NMR (400 MHz, CDCl<sub>3</sub>)  $\delta$  3.95 (3H, s), 5.16 (3H, s), 6.52 (1H, s), 6.80 (1H, dd,  $J$  = 9.2, 2.4 Hz), 7.15 (1H, d,  $J$  = 2.4 Hz), 7.19 (2H, t,  $J$  = 8.8 Hz), 7.38 (2H, dd,  $J$  = 8.8, 5.2 Hz), 7.41 (1H, d,  $J$  = 9.2 Hz); <sup>13</sup>C-NMR (100 MHz, CDCl<sub>3</sub>)  $\delta$  55.8, 52.7, 95.3, 111.3, 113.5, 115.7 ( $J$  = 10.7 Hz), 118.9, 128.9, 130.6 ( $J$  = 4.1 Hz), 132.9 ( $J$  = 1.7 Hz), 139.8, 157.7, 162.5, 163.0 ( $J$  = 123.5 Hz); MS  $m/z$  (relative intensity) 299 (M<sup>+</sup>, 78), 269 (100); HRMS calcd for C<sub>17</sub>H<sub>14</sub>FNO<sub>3</sub> 299.0958, found 299.0962.

### 7-Fluoro-1-methoxy-4-(4-methoxyphenyl)-1*H*-quinolin-2-one (2ec')

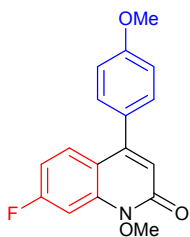

mp 148–149 °C (colorless scales from CHCl<sub>3</sub>/hexane); IR  $\nu$  (film, cm<sup>-1</sup>) 2918, 1670, 1620, 1249; <sup>1</sup>H-NMR (400 MHz, CDCl<sub>3</sub>)  $\delta$  3.89 (3H, s), 4.15 (3H, s), 6.62 (1H, s), 6.93 (1H, td,  $J$  = 8.4, 2.5 Hz), 7.03 (2H, d,  $J$  = 8.8 Hz), 7.34 (2H, d,  $J$  = 8.8 Hz), 7.38 (1H, dd,  $J$  = 9.7, 2.5 Hz), 7.60 (1H, dd,  $J$  = 9.7, 6.0 Hz); <sup>13</sup>C-NMR (100 MHz, CDCl<sub>3</sub>)  $\delta$  55.4, 63.0, 99.0 ( $J$  = 14.0 Hz), 110.8 ( $J$  = 11.5 Hz), 114.2, 116.5, 120.5 ( $J$  = 1.7 Hz), 128.7, 130.0 ( $J$  = 4.1 Hz), 130.1, 139.7 ( $J$  = 5.8 Hz), 150.1, 157.6, 160.3, 164.6 ( $J$  = 125.1 Hz); MS  $m/z$  (relative intensity) 299 (M<sup>+</sup>, 65), 269 (100); HRMS calcd for C<sub>17</sub>H<sub>14</sub>FNO<sub>3</sub> 299.0958, found 299.0951.

#### 4-(4-Chlorophenyl)-1,7-dimethoxy-1*H*-quinolin-2-one (2ed)

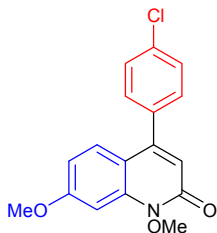

mp 187–188 °C (yellow scales from CHCl<sub>3</sub>/hexane); IR  $\nu$  (film, cm<sup>-1</sup>) 2935, 1665, 1612; <sup>1</sup>H-NMR (400 MHz, CDCl<sub>3</sub>)  $\delta$  3.95 (3H, s), 4.15 (3H, s), 6.50 (1H, s), 6.79 (1H, dd,  $J$  = 8.8, 2.0 Hz), 7.14 (1H, d,  $J$  = 2.0 Hz), 7.34 (2H, d,  $J$  = 8.4 Hz), 7.39 (1H, d,  $J$  = 8.8 Hz), 7.47 (2H, d,  $J$  = 8.4 Hz); <sup>13</sup>C-NMR (100 MHz, CDCl<sub>3</sub>)  $\delta$  55.7, 62.3, 95.4, 111.3, 113.3, 118.8, 128.8, 128.9, 130.0, 134.9, 135.3, 139.8, 149.3, 157.6, 162.5; MS  $m/z$  (relative intensity) 315 (M<sup>+</sup>, 93), 285 (100); HRMS calcd for C<sub>17</sub>H<sub>14</sub><sup>35</sup>ClNO<sub>3</sub> 315.0662, found 315.0645.

#### 7-Chloro-1-methoxy-4-(4-methoxyphenyl)-1*H*-quinolin-2-one (2ed')

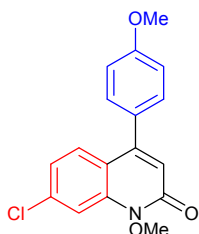

mp 162–163 °C (yellow scales from CHCl<sub>3</sub>/hexane); IR  $\nu$  (film, cm<sup>-1</sup>) 2936, 1668, 1605, 1249; <sup>1</sup>H-NMR (400 MHz, CDCl<sub>3</sub>)  $\delta$  3.89 (3H, s), 4.15 (3H, s), 6.65 (1H, s), 7.03 (2H, d,  $J$  = 8.4 Hz), 7.17 (1H, dd,  $J$  = 8.8, 2.0 Hz), 7.34 (2H, d,  $J$  = 8.4 Hz), 7.54 (1H, d,  $J$  = 8.8 Hz), 7.69 (1H, d,  $J$  = 2.0 Hz); <sup>13</sup>C-NMR (100 MHz, CDCl<sub>3</sub>)  $\delta$  55.4, 63.1, 112.0, 114.2, 118.3, 121.6, 123.1, 128.4, 129.0, 130.1, 137.6, 138.8, 150.0, 157.3, 160.3; MS  $m/z$  (relative intensity) 315 (M<sup>+</sup>, 66), 285 (100); HRMS calcd for C<sub>17</sub>H<sub>14</sub><sup>35</sup>ClNO<sub>3</sub> 315.0662, found 315.0679.

#### 4-(4-Bromophenyl)-1,7-dimethoxy-1*H*-quinolin-2-one (2ek)

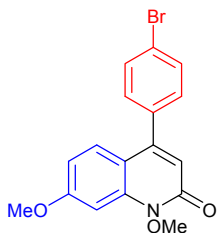

Mp 175–176 °C (colorless scales from CHCl<sub>3</sub>/hexane); IR  $\nu$  (film, cm<sup>-1</sup>) 2934, 1664, 1611, 1222; <sup>1</sup>H-NMR (400 MHz, CDCl<sub>3</sub>)  $\delta$  3.95 (3H, s), 4.15 (3H, s), 6.51 (1H, s), 6.79 (1H, dd,  $J$  = 9.2, 2.4 Hz), 7.14 (1H, d,  $J$  = 2.4 Hz), 7.28 (2H, d,  $J$  = 8.4 Hz), 7.39 (1H, d,  $J$  = 9.2 Hz), 7.63 (2H, d,  $J$  = 8.4 Hz); <sup>13</sup>C-NMR (100 MHz, CDCl<sub>3</sub>)  $\delta$  55.8, 62.7, 95.4, 111.4, 113.3, 118.8, 123.2, 128.8, 130.4, 131.9, 135.9, 139.9, 149.4, 157.7, 162.5; MS  $m/z$  (relative intensity) 361 (M<sup>+</sup>+2, 78), 359 (M<sup>+</sup>, 77), 331, (100), 329 (99); HRMS calcd for C<sub>17</sub>H<sub>14</sub><sup>79</sup>BrNO<sub>3</sub> 359.0157, found 359.0143.

### 7-Bromo-4-(4-methoxyphenyl)-1*H*-quinolin-2-one (2ek')

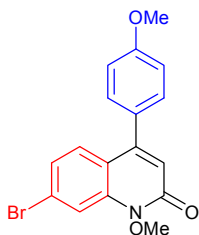

IR  $\nu$  (film,  $\text{cm}^{-1}$ ) 2923, 1670, 1609, 1255;  $^1\text{H-NMR}$  (400 MHz,  $\text{CDCl}_3$ )  $\delta$  3.89 (3H, s), 4.15 (3H, s), 6.67 (1H, s), 7.03 (2H, d,  $J = 8.8$  Hz), 7.31 (1H, dd,  $J = 8.6, 2.0$  Hz), 7.33 (2H, d,  $J = 8.8$  Hz), 7.46 (1H, d,  $J = 8.6$  Hz), 7.86 (1H, d,  $J = 2.0$  Hz);  $^{13}\text{C-NMR}$  (100 MHz,  $\text{CDCl}_3$ )  $\delta$  55.4, 63.1, 114.2, 114.9, 118.7, 121.8, 125.8, 125.9, 128.4, 129.0, 130.1, 138.9, 150.1, 157.3, 160.3; MS  $m/z$  (relative intensity) 361 ( $\text{M}^{+2}$ , 89), 359 ( $\text{M}^+$ , 89), 331, (100), 329 (100); HRMS calcd for  $\text{C}_{17}\text{H}_{14}^{79}\text{BrNO}_3$  359.0157, found 359.0125.

### 1,6-Dimethoxy-4-phenyl-1*H*-quinolin-2-one (2ha)

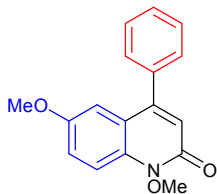

Mp 150–151 °C (colorless prisms from  $\text{CHCl}_3$ /hexane); IR  $\nu$  (film,  $\text{cm}^{-1}$ ) 2937, 1660, 1034;  $^1\text{H-NMR}$  (400 MHz,  $\text{CDCl}_3$ )  $\delta$  3.73 (3H, s), 4.15 (3H, s), 6.71 (1H, s), 7.01 (1H, d,  $J = 2.8$  Hz), 7.26 (1H, dd,  $J = 9.2, 2.4$  Hz), 7.41–7.54 (5H, m), 7.64 (1H, d,  $J = 9.2$  Hz);  $^{13}\text{C-NMR}$  (100 MHz,  $\text{CDCl}_3$ )  $\delta$  55.7, 62.9, 110.0, 113.5, 119.5, 120.6, 122.7, 128.7, 128.9, 132.7, 136.7, 150.0, 155.2, 156.8; MS  $m/z$  (relative intensity) 281 ( $\text{M}^+$ , 100); HRMS calcd for  $\text{C}_{17}\text{H}_{15}\text{NO}_3$  281.1052, found 281.1053.

### 1,6-Dimethoxy-4-(4-trifluorophenyl)-1*H*-quinolin-2-one (2hh)

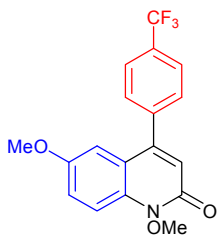

Mp 165–166 °C (colorless prisms from  $\text{CHCl}_3$ /hexane); IR  $\nu$  (film,  $\text{cm}^{-1}$ ) 2918, 1659, 1325;  $^1\text{H-NMR}$  (400 MHz,  $\text{CDCl}_3$ )  $\delta$  3.75 (3H, s), 4.15 (3H, s), 6.70 (1H, s), 6.88 (1H, d,  $J = 2.4$  Hz), 7.28 (1H, dd,  $J = 9.2, 2.4$  Hz), 7.56 (2H, d,  $J = 8.0$  Hz), 7.66 (1H, d,  $J = 9.2$  Hz), 7.79 (2H, d,  $J = 8.0$  Hz);  $^{13}\text{C-NMR}$  (100 MHz,  $\text{CDCl}_3$ )  $\delta$  55.7, 62.9, 109.6, 113.7, 119.8, 120.0, 123.1, 123.9 ( $J = 264.2$  Hz), 125.8 ( $J = 3.8$  Hz), 129.1, 131.1 ( $J = 32.1$  Hz), 132.8, 140.3, 148.5, 155.4, 156.5; MS  $m/z$  (relative intensity) 349 ( $\text{M}^+$ , 81); HRMS calcd for  $\text{C}_{18}\text{H}_{14}\text{F}_3\text{NO}_3$  349.0926, found 349.0940.

**4-(4-Chlorophenyl)-1,6-dimethoxy-1*H*-quinolin-2-one (2hd)**

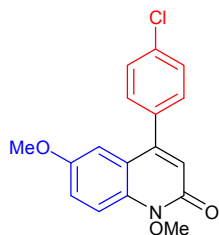

Mp 187–188 °C (colorless needles from CHCl<sub>3</sub>/hexane); IR  $\nu$  (film, cm<sup>-1</sup>) 2936, 1660; <sup>1</sup>H-NMR (400 MHz, CDCl<sub>3</sub>)  $\delta$  3.75 (3H, s), 4.14 (3H, s), 6.68 (1H, s), 6.93 (1H, d,  $J$  = 2.8 Hz), 7.26 (1H, dd,  $J$  = 9.2, 2.8 Hz), 7.37 (2H, d,  $J$  = 8.8 Hz), 7.49 (2H, d,  $J$  = 8.8 Hz), 7.64 (1H, d,  $J$  = 9.2 Hz); <sup>13</sup>C-NMR (100 MHz, CDCl<sub>3</sub>)  $\delta$  55.7, 62.9, 109.6, 113.7, 119.8, 120.3, 122.9, 129.1, 130.0, 132.7, 135.1, 148.8, 155.3, 156.6; MS  $m/z$  (relative intensity) 315 (M<sup>+</sup>, 100); HRMS calcd for C<sub>17</sub>H<sub>14</sub><sup>35</sup>ClNO<sub>3</sub> 315.0662, found 315.0651.

## References

- 1) O. Miyata, A. Nishiguchi, I. Ninomiya, K. Aoe, K. Okamura and T. Naito, *J. Org. Chem.*, 2000, **65**, 6922.
- 2) S. A. Glover, A. Goosen, G. C. W. McClelland and J. L. Schoonraad, *Tetrahedron*, 1987, **43**, 2577.
